# Supplementary material for: Laser-induced transformation of freestanding carbon nanotubes into graphene nanoribbons
Source: Royal Society of Chemistry journal article supplement (doi:10.1039/c5ra05836h), 2015-01-01
Supplement: c5ra05836h1.pdf [file c5ra05836h1.pdf]

## Supporting Information

### Laser-induced transformation of freestanding carbon nanotubes into graphene nanoribbons

Hai Hoang Van,<sup>ab</sup> Kaelyn Badura,<sup>b</sup> and Mei Zhang<sup>ab</sup>

<sup>a</sup> Industrial and Manufacturing Engineering Department, FAMU-FSU College of Engineering, 2525 Pottsdamer Street, Tallahassee, Florida 32310-6046

<sup>b</sup> High-Performance Materials Institute, Florida State University, 2005 Levy Ave., Tallahassee, Florida 32310

1. Fourier transform infrared (FTIR) spectra shows the transmittance of carbon nanotube (CNT) sheet before and after 100 mW laser irradiation. The wavelength of laser beam is 10.6  $\mu\text{m}$ , corresponding to the wavenumber of 942  $\text{cm}^{-1}$ . The transmittance of CNTs at 10.6  $\mu\text{m}$  is 82%.

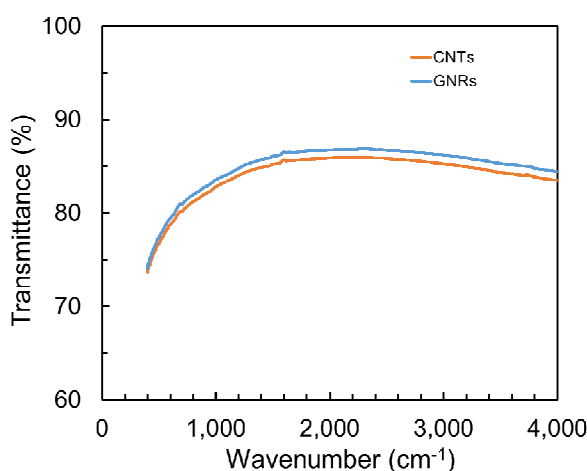

**Fig. S1:** FTIR spectra of the original CNT sheet and the produced GNRs.

2. Raman spectra of the original CNTs and the produced GNRs by 100 mW laser irradiation.

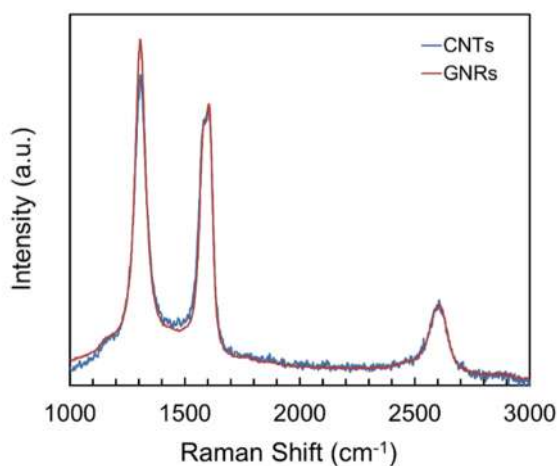

**Fig. S2:** Raman spectra of the original CNTs and the produced GNRs.

3. Raman spectra of GNRs before and after the post-treatment process.

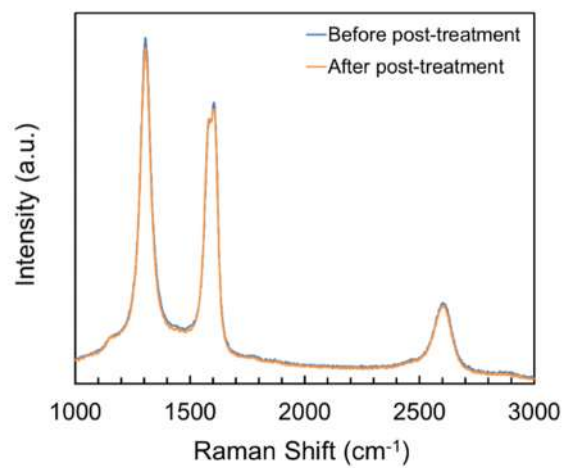

**Fig. S3:** Raman spectra of the produced GNRs before and after post-treatment process.
